# Supplementary material
Source: publisher figshare collection journal article supplement (https://acs.figshare.com/ndownloader/files/5184847)
Supplement: Supplementary file 1 [file 5184847]

data_ir
 
_audit_creation_method            SHELXL-97
_chemical_name_systematic
;
 ?
;
_chemical_name_common             ?
_chemical_melting_point           ?
_chemical_formula_moiety          '(C45 H31 Br Ir N4)+, (N O3)-,2(H2 O) '
_chemical_formula_sum
 'C45 H35 Br Ir N5 O5'
_chemical_formula_weight          997.89
 
loop_
 _atom_type_symbol
 _atom_type_description
 _atom_type_scat_dispersion_real
 _atom_type_scat_dispersion_imag
 _atom_type_scat_source
 'Ir'  'Ir'  -1.4442   7.9887
 'International Tables Vol C Tables 4.2.6.8 and 6.1.1.4'
 'C'  'C'   0.0033   0.0016
 'International Tables Vol C Tables 4.2.6.8 and 6.1.1.4'
 'H'  'H'   0.0000   0.0000
 'International Tables Vol C Tables 4.2.6.8 and 6.1.1.4'
 'Br'  'Br'  -0.2901   2.4595
 'International Tables Vol C Tables 4.2.6.8 and 6.1.1.4'
 'N'  'N'   0.0061   0.0033
 'International Tables Vol C Tables 4.2.6.8 and 6.1.1.4'
 'O'  'O'   0.0106   0.0060
 'International Tables Vol C Tables 4.2.6.8 and 6.1.1.4'
 
_symmetry_cell_setting            'monoclinic'
_symmetry_space_group_name_H-M    'P 21/n'
 
loop_
 _symmetry_equiv_pos_as_xyz
 'x, y, z'
 '-x+1/2, y+1/2, -z+1/2'
 '-x, -y, -z'
 'x-1/2, -y-1/2, z-1/2'
 
_cell_length_a                    17.4308(4)
_cell_length_b                    9.0312(2)
_cell_length_c                    26.7601(7)
_cell_angle_alpha                 90.00
_cell_angle_beta                  104.496(1)
_cell_angle_gamma                 90.00
_cell_volume                      4078.5(2)
_cell_formula_units_Z             4
_cell_measurement_temperature     295
_cell_measurement_reflns_used     36873
_cell_measurement_theta_min       4.13
_cell_measurement_theta_max       26
 
_exptl_crystal_description        'plate'
_exptl_crystal_colour             'red'
_exptl_crystal_size_max           0.38
_exptl_crystal_size_mid           0.14
_exptl_crystal_size_min           0.04
_exptl_crystal_density_meas       ?
_exptl_crystal_density_diffrn     1.625
_exptl_crystal_density_method     'not measured'
_exptl_crystal_F_000              1968
_exptl_absorpt_coefficient_mu     4.306
_exptl_absorpt_correction_type    'empirical'
_exptl_absorpt_correction_T_min   0.452
_exptl_absorpt_correction_T_max   0.849
_exptl_absorpt_process_details    
;
SORTAV (R.H. Blessing, Acta Crystallogr., 1995, A51, 33)
;
_exptl_special_details
;
 ?
;
 
_diffrn_ambient_temperature       295
_diffrn_radiation_wavelength      0.71073
_diffrn_radiation_type            MoK\a
_diffrn_radiation_source          'fine-focus sealed tube'
_diffrn_radiation_monochromator   graphite
_diffrn_measurement_device_type   'Nonius Kappa CCD'
_diffrn_measurement_method        '\f scans and \w scans'
_diffrn_detector_area_resol_mean  ?
_diffrn_standards_number          ?
_diffrn_standards_interval_count  ?
_diffrn_standards_interval_time   ?
_diffrn_standards_decay_%         ?
_diffrn_reflns_number             36873
_diffrn_reflns_av_R_equivalents   0.0774
_diffrn_reflns_av_sigmaI/netI     0.0566
_diffrn_reflns_limit_h_min        -21
_diffrn_reflns_limit_h_max        21
_diffrn_reflns_limit_k_min        -11
_diffrn_reflns_limit_k_max        11
_diffrn_reflns_limit_l_min        -27
_diffrn_reflns_limit_l_max        33
_diffrn_reflns_theta_min          4.13
_diffrn_reflns_theta_max          26.00
_reflns_number_total              7964
_reflns_number_gt                 6044
_reflns_threshold_expression      'I>2sigma(I)'
 
_computing_data_collection        'COLLECT (Nonius, 1998)'
_computing_cell_refinement        'Denzo-SMN (Otwinowski & Minor, 1997)'
_computing_data_reduction         'Denzo-SMN (Otwinowski & Minor, 1997)'
_computing_structure_solution     'SIR97 (Altomare et al., 1999)'
_computing_structure_refinement   'SHELXL-97 (Sheldrick, 1997)'
_computing_molecular_graphics     'ORTEP III (Burnett & Johnson, 1996)'
_computing_publication_material   
;
SHELXL-97 (Sheldrick, 1997), PARST (Nardelli, 1995)
;
 
_refine_special_details
;
 Refinement of F^2^ against ALL reflections.  The weighted R-factor wR and
 goodness of fit S are based on F^2^, conventional R-factors R are based
 on F, with F set to zero for negative F^2^. The threshold expression of
 F^2^ > 2sigma(F^2^) is used only for calculating R-factors(gt) etc. and is
 not relevant to the choice of reflections for refinement.  R-factors based
 on F^2^ are statistically about twice as large as those based on F, and R-
 factors based on ALL data will be even larger.
;
 
_refine_ls_structure_factor_coef  Fsqd
_refine_ls_matrix_type            full
_refine_ls_weighting_scheme       calc
_refine_ls_weighting_details
 'calc w=1/[\s^2^(Fo^2^)+(0.0507P)^2^+13.8881P] where P=(Fo^2^+2Fc^2^)/3'
_atom_sites_solution_primary      direct
_atom_sites_solution_secondary    difmap
_atom_sites_solution_hydrogens    geom
_refine_ls_hydrogen_treatment     constr
_refine_ls_extinction_method      none
_refine_ls_extinction_coef        ?
_refine_ls_number_reflns          7964
_refine_ls_number_parameters      544
_refine_ls_number_restraints      0
_refine_ls_R_factor_all           0.0881
_refine_ls_R_factor_gt            0.0590
_refine_ls_wR_factor_ref          0.1418
_refine_ls_wR_factor_gt           0.1319
_refine_ls_goodness_of_fit_ref    1.114
_refine_ls_restrained_S_all       1.114
_refine_ls_shift/su_max           0.010
_refine_ls_shift/su_mean          0.000
 
loop_
 _atom_site_label
 _atom_site_type_symbol
 _atom_site_fract_x
 _atom_site_fract_y
 _atom_site_fract_z
 _atom_site_U_iso_or_equiv
 _atom_site_adp_type
 _atom_site_occupancy
 _atom_site_symmetry_multiplicity
 _atom_site_calc_flag
 _atom_site_refinement_flags
 _atom_site_disorder_assembly
 _atom_site_disorder_group
Ir1 Ir 0.085546(18) 0.15893(3) -0.159258(12) 0.05833(13) Uani 1 1 d . . .
Br1 Br 0.60918(9) 0.0295(2) 0.15606(6) 0.1486(6) Uani 1 1 d . . .
N1 N 0.1805(4) 0.1326(6) -0.1037(2) 0.0555(15) Uani 1 1 d . . .
N2 N 0.0662(4) -0.0490(6) -0.1348(3) 0.0618(16) Uani 1 1 d . . .
N3 N 0.1402(4) 0.3584(6) -0.1635(2) 0.0579(15) Uani 1 1 d . . .
N4 N -0.0147(4) 0.1934(6) -0.2153(3) 0.0556(15) Uani 1 1 d . . .
C1 C 0.0029(6) -0.1359(9) -0.1537(4) 0.075(2) Uani 1 1 d . . .
H1 H -0.0381 -0.1016 -0.1806 0.090 Uiso 1 1 calc R . .
C2 C -0.0019(7) -0.2760(10) -0.1335(5) 0.087(3) Uani 1 1 d . . .
H2 H -0.0454 -0.3358 -0.1475 0.104 Uiso 1 1 calc R . .
C3 C 0.0572(7) -0.3273(10) -0.0931(4) 0.079(3) Uani 1 1 d . . .
H3 H 0.0544 -0.4214 -0.0795 0.095 Uiso 1 1 calc R . .
C4 C 0.1199(6) -0.2368(8) -0.0733(3) 0.071(2) Uani 1 1 d . . .
H4 H 0.1596 -0.2683 -0.0452 0.085 Uiso 1 1 calc R . .
C5 C 0.1252(5) -0.0985(9) -0.0944(3) 0.0611(19) Uani 1 1 d . . .
C6 C 0.1909(5) 0.0055(8) -0.0768(3) 0.062(2) Uani 1 1 d . . .
C7 C 0.2570(5) -0.0141(8) -0.0360(3) 0.063(2) Uani 1 1 d . . .
H7 H 0.2645 -0.1020 -0.0173 0.076 Uiso 1 1 calc R . .
C8 C 0.3123(5) 0.1015(10) -0.0235(3) 0.066(2) Uani 1 1 d . . .
C9 C 0.2981(5) 0.2327(9) -0.0524(3) 0.068(2) Uani 1 1 d . . .
H9 H 0.3341 0.3103 -0.0443 0.081 Uiso 1 1 calc R . .
C10 C 0.2333(5) 0.2479(8) -0.0914(3) 0.061(2) Uani 1 1 d . . .
C11 C 0.2087(5) 0.3764(8) -0.1259(3) 0.0584(19) Uani 1 1 d . . .
C12 C 0.2490(5) 0.5071(9) -0.1218(4) 0.073(2) Uani 1 1 d . . .
H12 H 0.2956 0.5200 -0.0962 0.087 Uiso 1 1 calc R . .
C13 C 0.2194(6) 0.6227(9) -0.1568(4) 0.076(2) Uani 1 1 d . . .
H13 H 0.2456 0.7131 -0.1543 0.091 Uiso 1 1 calc R . .
C14 C 0.1536(6) 0.6001(10) -0.1933(4) 0.074(2) Uani 1 1 d . . .
H14 H 0.1339 0.6746 -0.2170 0.089 Uiso 1 1 calc R . .
C15 C 0.1142(5) 0.4679(9) -0.1965(3) 0.064(2) Uani 1 1 d . . .
H15 H 0.0680 0.4544 -0.2224 0.077 Uiso 1 1 calc R . .
C16 C 0.3849(5) 0.0826(11) 0.0199(4) 0.075(2) Uani 1 1 d . . .
C17 C 0.3813(13) 0.001(3) 0.0636(10) 0.079(6) Uani 0.40 1 d P . .
H17 H 0.3384 -0.0583 0.0614 0.100 Uiso 0.40 1 d P . .
C17' C 0.4222(11) -0.0637(17) 0.0293(8) 0.098(6) Uani 0.60 1 d P . .
H17' H 0.4001 -0.1449 0.0102 0.110 Uiso 0.60 1 d P . .
C18 C 0.4498(17) -0.018(4) 0.1046(11) 0.106(9) Uani 0.40 1 d P . .
H18 H 0.4496 -0.0780 0.1324 0.120 Uiso 0.40 1 d P . .
C18' C 0.4871(12) -0.079(2) 0.0694(10) 0.111(7) Uani 0.60 1 d P . .
H18' H 0.5081 -0.1701 0.0820 0.140 Uiso 0.60 1 d P . .
C19 C 0.5196(7) 0.0528(14) 0.1004(4) 0.098(3) Uani 1 1 d . . .
C20 C 0.528(2) 0.152(4) 0.0598(18) 0.122(13) Uani 0.40 1 d P . .
H20 H 0.5509 0.2404 0.0781 0.120 Uiso 0.40 1 d P . .
C20' C 0.4918(12) 0.180(2) 0.0850(9) 0.095(6) Uani 0.60 1 d P . .
H20' H 0.5241 0.2613 0.0975 0.110 Uiso 0.60 1 d P . .
C21 C 0.4547(17) 0.162(3) 0.0194(12) 0.090(8) Uani 0.40 1 d P . .
H21 H 0.4484 0.2408 0.0005 0.100 Uiso 0.40 1 d P . .
C21' C 0.4244(12) 0.1994(19) 0.0466(7) 0.084(5) Uani 0.60 1 d P . .
H21' H 0.4083 0.2942 0.0355 0.100 Uiso 0.60 1 d P . .
C22 C 0.0138(5) 0.2619(8) -0.1159(3) 0.061(2) Uani 1 1 d . . .
C23 C 0.0312(6) 0.2885(9) -0.0643(4) 0.076(2) Uani 1 1 d . . .
H23 H 0.0806 0.2611 -0.0439 0.091 Uiso 1 1 calc R . .
C24 C -0.0218(9) 0.3539(11) -0.0421(4) 0.097(3) Uani 1 1 d . . .
H24 H -0.0082 0.3731 -0.0068 0.117 Uiso 1 1 calc R . .
C25 C -0.0971(9) 0.3927(11) -0.0721(5) 0.100(4) Uani 1 1 d . . .
H25 H -0.1347 0.4329 -0.0567 0.121 Uiso 1 1 calc R . .
C26 C -0.1148(6) 0.3706(10) -0.1248(4) 0.084(3) Uani 1 1 d . . .
H26 H -0.1635 0.4004 -0.1455 0.101 Uiso 1 1 calc R . .
C27 C -0.0587(5) 0.3031(9) -0.1466(3) 0.066(2) Uani 1 1 d . . .
C28 C -0.0754(5) 0.2669(9) -0.2029(3) 0.064(2) Uani 1 1 d . . .
C29 C -0.1408(5) 0.2996(10) -0.2412(4) 0.073(2) Uani 1 1 d . . .
H29 H -0.1827 0.3496 -0.2331 0.088 Uiso 1 1 calc R . .
C30 C -0.1465(5) 0.2604(10) -0.2920(4) 0.074(2) Uani 1 1 d . . .
C31 C -0.0844(5) 0.1801(9) -0.3026(4) 0.072(2) Uani 1 1 d . . .
H31 H -0.0874 0.1477 -0.3360 0.087 Uiso 1 1 calc R . .
C32 C -0.0188(5) 0.1487(8) -0.2636(3) 0.0600(19) Uani 1 1 d . . .
C33 C 0.0524(5) 0.0635(9) -0.2675(3) 0.063(2) Uani 1 1 d . . .
C34 C 0.0556(5) -0.0141(10) -0.3126(3) 0.072(2) Uani 1 1 d . . .
H34 H 0.0129 -0.0119 -0.3415 0.086 Uiso 1 1 calc R . .
C35 C 0.1225(6) -0.0927(10) -0.3133(4) 0.078(2) Uani 1 1 d . . .
H35 H 0.1252 -0.1446 -0.3428 0.094 Uiso 1 1 calc R . .
C36 C 0.1857(6) -0.0954(10) -0.2706(4) 0.077(2) Uani 1 1 d . . .
H36 H 0.2310 -0.1492 -0.2710 0.093 Uiso 1 1 calc R . .
C37 C 0.1810(5) -0.0152(10) -0.2259(4) 0.073(2) Uani 1 1 d . . .
H37 H 0.2247 -0.0151 -0.1976 0.087 Uiso 1 1 calc R . .
C38 C 0.1155(5) 0.0613(8) -0.2228(3) 0.060(2) Uani 1 1 d . . .
C39 C -0.2145(5) 0.3095(10) -0.3347(4) 0.078(3) Uani 1 1 d . . .
C40 C -0.2396(6) 0.2314(11) -0.3796(4) 0.090(3) Uani 1 1 d . . .
H40 H -0.2141 0.1435 -0.3839 0.108 Uiso 1 1 calc R . .
C41 C -0.3023(6) 0.2811(11) -0.4187(4) 0.087(3) Uani 1 1 d . . .
H41 H -0.3187 0.2254 -0.4487 0.104 Uiso 1 1 calc R . .
C42 C -0.3405(5) 0.4111(12) -0.4138(4) 0.084(3) Uani 1 1 d . . .
C43 C -0.3172(7) 0.4858(13) -0.3692(5) 0.110(4) Uani 1 1 d . . .
H43 H -0.3434 0.5725 -0.3646 0.131 Uiso 1 1 calc R . .
C44 C -0.2552(7) 0.4363(12) -0.3303(5) 0.106(4) Uani 1 1 d . . .
H44 H -0.2405 0.4909 -0.2999 0.127 Uiso 1 1 calc R . .
C45 C -0.4078(6) 0.4698(12) -0.4573(4) 0.099(3) Uani 1 1 d . . .
H451 H -0.4018 0.4333 -0.4898 0.119 Uiso 1 1 calc R . .
H452 H -0.4064 0.5761 -0.4574 0.119 Uiso 1 1 calc R . .
H453 H -0.4577 0.4370 -0.4522 0.119 Uiso 1 1 calc R . .
N5 N 0.1751(17) 0.0946(17) 0.4685(8) 0.178(8) Uani 1 1 d . . .
O1 O 0.1223(9) 0.0491(16) 0.4268(6) 0.202(6) Uani 1 1 d . . .
O2A O 0.242(2) 0.060(4) 0.4889(15) 0.231(17) Uiso 0.50 1 d P . .
O2B O 0.2278(17) 0.166(3) 0.4524(11) 0.170(9) Uiso 0.50 1 d P . .
O3A O 0.1659(19) 0.127(3) 0.5055(12) 0.159(9) Uiso 0.50 1 d P . .
O3B O 0.1260(16) 0.077(3) 0.5033(10) 0.151(9) Uiso 0.50 1 d P . .
O4 O 0.0455(9) -0.0327(17) 0.5522(7) 0.253(8) Uani 1 1 d . . .
O5 O 0.352(2) 0.727(5) 0.1729(16) 0.50(2) Uiso 1 1 d . . .
 
loop_
 _atom_site_aniso_label
 _atom_site_aniso_U_11
 _atom_site_aniso_U_22
 _atom_site_aniso_U_33
 _atom_site_aniso_U_23
 _atom_site_aniso_U_13
 _atom_site_aniso_U_12
Ir1 0.0604(2) 0.05209(18) 0.0629(2) 0.00321(15) 0.01617(14) -0.00632(15)
Br1 0.1063(10) 0.1615(14) 0.1437(12) 0.0335(10) -0.0325(9) -0.0076(9)
N1 0.063(4) 0.048(3) 0.055(4) 0.009(3) 0.014(3) -0.005(3)
N2 0.067(4) 0.044(3) 0.079(5) -0.004(3) 0.028(4) -0.012(3)
N3 0.062(4) 0.049(3) 0.065(4) 0.008(3) 0.020(3) -0.004(3)
N4 0.051(3) 0.048(3) 0.067(4) 0.000(3) 0.014(3) -0.001(3)
C1 0.078(6) 0.068(5) 0.083(6) -0.013(4) 0.028(5) -0.019(5)
C2 0.104(8) 0.057(5) 0.116(8) -0.010(5) 0.056(7) -0.025(5)
C3 0.103(7) 0.054(5) 0.093(7) 0.004(5) 0.047(6) -0.005(5)
C4 0.098(7) 0.044(4) 0.074(6) 0.005(4) 0.029(5) -0.009(4)
C5 0.066(5) 0.053(4) 0.065(5) 0.001(4) 0.018(4) -0.005(4)
C6 0.071(5) 0.056(4) 0.062(5) 0.006(4) 0.020(4) -0.005(4)
C7 0.077(5) 0.036(4) 0.074(5) 0.004(3) 0.013(4) 0.004(4)
C8 0.058(5) 0.070(5) 0.069(5) 0.004(4) 0.012(4) -0.003(4)
C9 0.066(5) 0.058(5) 0.075(6) 0.002(4) 0.012(4) -0.007(4)
C10 0.069(5) 0.053(4) 0.061(5) 0.000(4) 0.018(4) -0.013(4)
C11 0.061(5) 0.056(4) 0.061(5) 0.002(3) 0.021(4) -0.006(4)
C12 0.072(5) 0.062(5) 0.089(6) -0.002(4) 0.028(5) -0.010(4)
C13 0.092(7) 0.048(4) 0.092(7) 0.011(4) 0.031(6) -0.007(4)
C14 0.074(6) 0.063(5) 0.087(6) 0.022(5) 0.024(5) 0.005(4)
C15 0.067(5) 0.062(5) 0.062(5) 0.010(4) 0.013(4) 0.000(4)
C16 0.070(6) 0.081(6) 0.073(6) 0.011(5) 0.018(5) 0.002(5)
C17 0.048(12) 0.100(17) 0.083(16) 0.006(14) 0.006(11) -0.005(12)
C17' 0.078(11) 0.062(9) 0.127(15) 0.023(9) -0.026(11) -0.010(8)
C18 0.081(18) 0.15(3) 0.081(18) 0.029(18) 0.006(15) -0.004(19)
C18' 0.088(13) 0.067(11) 0.17(2) 0.030(12) 0.019(15) -0.006(10)
C19 0.079(7) 0.113(9) 0.091(7) 0.020(7) -0.002(6) -0.009(7)
C20 0.10(3) 0.10(2) 0.15(4) 0.01(2) 0.01(2) 0.00(2)
C20' 0.072(12) 0.075(12) 0.109(16) 0.017(11) -0.029(11) -0.008(10)
C21 0.079(18) 0.087(18) 0.087(19) 0.002(15) -0.010(15) -0.007(15)
C21' 0.101(14) 0.068(10) 0.078(12) 0.015(9) 0.012(11) 0.020(9)
C22 0.075(6) 0.045(4) 0.070(5) -0.006(4) 0.034(4) -0.016(4)
C23 0.111(7) 0.055(4) 0.073(6) -0.008(4) 0.046(6) -0.019(5)
C24 0.153(11) 0.072(6) 0.077(7) -0.006(5) 0.046(8) -0.020(7)
C25 0.146(11) 0.065(6) 0.120(10) -0.012(6) 0.089(9) -0.011(7)
C26 0.090(7) 0.071(6) 0.100(8) -0.007(5) 0.040(6) -0.004(5)
C27 0.077(6) 0.053(4) 0.076(6) -0.007(4) 0.034(5) -0.014(4)
C28 0.051(5) 0.056(4) 0.085(6) -0.002(4) 0.018(4) -0.002(4)
C29 0.052(5) 0.074(5) 0.096(7) -0.009(5) 0.023(5) 0.008(4)
C30 0.057(5) 0.070(5) 0.092(7) -0.012(5) 0.012(5) 0.006(4)
C31 0.065(5) 0.072(5) 0.078(6) -0.003(4) 0.013(4) 0.010(4)
C32 0.053(4) 0.062(4) 0.063(5) 0.001(4) 0.011(4) 0.000(4)
C33 0.062(5) 0.062(5) 0.065(5) 0.002(4) 0.017(4) 0.005(4)
C34 0.064(5) 0.082(6) 0.071(6) -0.004(5) 0.018(4) 0.002(5)
C35 0.083(7) 0.074(5) 0.089(7) -0.004(5) 0.041(6) 0.001(5)
C36 0.078(6) 0.075(6) 0.087(7) 0.015(5) 0.038(6) 0.012(5)
C37 0.061(5) 0.084(6) 0.077(6) 0.023(5) 0.023(4) 0.001(5)
C38 0.075(5) 0.042(4) 0.071(5) 0.004(3) 0.031(4) -0.001(4)
C39 0.060(5) 0.077(6) 0.090(7) -0.013(5) 0.004(5) 0.009(4)
C40 0.073(6) 0.078(6) 0.111(8) -0.002(6) 0.006(6) 0.025(5)
C41 0.080(6) 0.076(6) 0.088(7) -0.010(5) -0.008(5) 0.017(5)
C42 0.061(6) 0.085(6) 0.102(8) 0.000(6) 0.015(5) 0.008(5)
C43 0.097(8) 0.100(8) 0.120(9) -0.025(7) 0.006(7) 0.036(7)
C44 0.103(8) 0.101(8) 0.102(8) -0.023(6) 0.004(7) 0.039(7)
C45 0.087(7) 0.099(8) 0.102(8) -0.007(6) 0.004(6) 0.024(6)
N5 0.29(3) 0.119(11) 0.151(15) -0.003(10) 0.096(18) 0.053(14)
O1 0.232(14) 0.182(12) 0.170(11) -0.061(10) 0.008(10) -0.004(10)
O4 0.218(14) 0.218(15) 0.290(17) -0.088(13) 0.002(13) 0.077(12)
 
_geom_special_details
;
 All esds (except the esd in the dihedral angle between two l.s. planes)
 are estimated using the full covariance matrix.  The cell esds are taken
 into account individually in the estimation of esds in distances, angles
 and torsion angles; correlations between esds in cell parameters are only
 used when they are defined by crystal symmetry.  An approximate (isotropic)
 treatment of cell esds is used for estimating esds involving l.s. planes.
;
 
loop_
 _geom_bond_atom_site_label_1
 _geom_bond_atom_site_label_2
 _geom_bond_distance
 _geom_bond_site_symmetry_2
 _geom_bond_publ_flag
Ir1 N1 1.943(6) . ?
Ir1 N4 2.022(6) . ?
Ir1 N2 2.044(6) . ?
Ir1 N3 2.053(6) . ?
Ir1 C38 2.094(8) . ?
Ir1 C22 2.121(8) . ?
Br1 C19 1.880(10) . ?
N1 C6 1.343(9) . ?
N1 C10 1.373(9) . ?
N2 C1 1.346(10) . ?
N2 C5 1.366(10) . ?
N3 C15 1.328(9) . ?
N3 C11 1.365(10) . ?
N4 C32 1.338(10) . ?
N4 C28 1.359(10) . ?
C1 C2 1.387(12) . ?
C1 H1 0.9300 . ?
C2 C3 1.374(14) . ?
C2 H2 0.9300 . ?
C3 C4 1.361(12) . ?
C3 H3 0.9300 . ?
C4 C5 1.383(11) . ?
C4 H4 0.9300 . ?
C5 C6 1.466(11) . ?
C6 C7 1.386(11) . ?
C7 C8 1.404(11) . ?
C7 H7 0.9300 . ?
C8 C9 1.403(12) . ?
C8 C16 1.497(12) . ?
C9 C10 1.340(11) . ?
C9 H9 0.9300 . ?
C10 C11 1.478(11) . ?
C11 C12 1.364(11) . ?
C12 C13 1.411(12) . ?
C12 H12 0.9300 . ?
C13 C14 1.323(12) . ?
C13 H13 0.9300 . ?
C14 C15 1.370(11) . ?
C14 H14 0.9300 . ?
C15 H15 0.9300 . ?
C16 C21' 1.36(2) . ?
C16 C17 1.40(3) . ?
C16 C21 1.41(3) . ?
C16 C17' 1.466(19) . ?
C17 C18 1.42(3) . ?
C17 C17' 1.42(3) . ?
C17 C18' 1.95(3) . ?
C17 C21' 2.04(3) . ?
C17 H17 0.91(2) . ?
C17' C18' 1.36(2) . ?
C17' C18 2.00(4) . ?
C17' H17' 0.921(17) . ?
C18 C18' 1.39(4) . ?
C18 C19 1.40(3) . ?
C18 H18 0.92(3) . ?
C18' C19 1.48(2) . ?
C18' H18' 0.925(18) . ?
C19 C20' 1.28(2) . ?
C19 C20 1.44(5) . ?
C20 C20' 1.07(4) . ?
C20 C21 1.46(5) . ?
C20 C21' 1.81(4) . ?
C20 H20 0.97(4) . ?
C20 H20' 1.43(4) . ?
C20' C21' 1.37(2) . ?
C20' C21 1.72(4) . ?
C20' H20 1.22(2) . ?
C20' H20' 0.933(19) . ?
C21 C21' 1.06(3) . ?
C21 H21 0.87(3) . ?
C21 H21' 1.56(3) . ?
C21' H21 1.45(2) . ?
C21' H21' 0.926(16) . ?
C22 C23 1.360(11) . ?
C22 C27 1.375(12) . ?
C23 C24 1.353(15) . ?
C23 H23 0.9300 . ?
C24 C25 1.401(16) . ?
C24 H24 0.9300 . ?
C25 C26 1.379(15) . ?
C25 H25 0.9300 . ?
C26 C27 1.399(13) . ?
C26 H26 0.9300 . ?
C27 C28 1.496(12) . ?
C28 C29 1.361(12) . ?
C29 C30 1.384(12) . ?
C29 H29 0.9300 . ?
C30 C31 1.389(12) . ?
C30 C39 1.492(12) . ?
C31 C32 1.372(11) . ?
C31 H31 0.9300 . ?
C32 C33 1.485(11) . ?
C33 C34 1.408(11) . ?
C33 C38 1.409(11) . ?
C34 C35 1.369(12) . ?
C34 H34 0.9300 . ?
C35 C36 1.374(13) . ?
C35 H35 0.9300 . ?
C36 C37 1.417(13) . ?
C36 H36 0.9300 . ?
C37 C38 1.355(11) . ?
C37 H37 0.9300 . ?
C39 C40 1.367(13) . ?
C39 C44 1.368(13) . ?
C40 C41 1.386(12) . ?
C40 H40 0.9300 . ?
C41 C42 1.372(13) . ?
C41 H41 0.9300 . ?
C42 C43 1.342(14) . ?
C42 C45 1.526(13) . ?
C43 C44 1.375(14) . ?
C43 H43 0.9300 . ?
C44 H44 0.9300 . ?
C45 H451 0.9600 . ?
C45 H452 0.9600 . ?
C45 H453 0.9600 . ?
N5 O3A 1.08(3) . ?
N5 O2A 1.19(4) . ?
N5 O2B 1.28(3) . ?
N5 O1 1.32(2) . ?
N5 O3B 1.42(3) . ?
O2A O2B 1.35(4) . ?
O2A O3A 1.61(5) . ?
O3A O3B 0.82(3) . ?
 
loop_
 _geom_angle_atom_site_label_1
 _geom_angle_atom_site_label_2
 _geom_angle_atom_site_label_3
 _geom_angle
 _geom_angle_site_symmetry_1
 _geom_angle_site_symmetry_3
 _geom_angle_publ_flag
N1 Ir1 N4 177.6(2) . . ?
N1 Ir1 N2 79.6(3) . . ?
N4 Ir1 N2 101.4(3) . . ?
N1 Ir1 N3 80.3(2) . . ?
N4 Ir1 N3 98.7(2) . . ?
N2 Ir1 N3 159.9(3) . . ?
N1 Ir1 C38 103.4(3) . . ?
N4 Ir1 C38 78.9(3) . . ?
N2 Ir1 C38 88.1(3) . . ?
N3 Ir1 C38 96.4(3) . . ?
N1 Ir1 C22 98.2(3) . . ?
N4 Ir1 C22 79.6(3) . . ?
N2 Ir1 C22 93.5(3) . . ?
N3 Ir1 C22 89.4(3) . . ?
C38 Ir1 C22 158.3(3) . . ?
C6 N1 C10 121.8(7) . . ?
C6 N1 Ir1 119.3(5) . . ?
C10 N1 Ir1 118.8(5) . . ?
C1 N2 C5 119.3(7) . . ?
C1 N2 Ir1 126.9(6) . . ?
C5 N2 Ir1 113.8(5) . . ?
C15 N3 C11 119.4(6) . . ?
C15 N3 Ir1 127.2(6) . . ?
C11 N3 Ir1 113.4(5) . . ?
C32 N4 C28 121.8(7) . . ?
C32 N4 Ir1 119.8(5) . . ?
C28 N4 Ir1 118.4(5) . . ?
N2 C1 C2 120.6(10) . . ?
N2 C1 H1 119.7 . . ?
C2 C1 H1 119.7 . . ?
C3 C2 C1 120.6(9) . . ?
C3 C2 H2 119.7 . . ?
C1 C2 H2 119.7 . . ?
C4 C3 C2 118.3(8) . . ?
C4 C3 H3 120.9 . . ?
C2 C3 H3 120.9 . . ?
C3 C4 C5 120.8(9) . . ?
C3 C4 H4 119.6 . . ?
C5 C4 H4 119.6 . . ?
N2 C5 C4 120.3(7) . . ?
N2 C5 C6 114.6(7) . . ?
C4 C5 C6 125.0(8) . . ?
N1 C6 C7 120.4(7) . . ?
N1 C6 C5 112.7(7) . . ?
C7 C6 C5 126.9(7) . . ?
C6 C7 C8 118.6(7) . . ?
C6 C7 H7 120.7 . . ?
C8 C7 H7 120.7 . . ?
C9 C8 C7 118.7(7) . . ?
C9 C8 C16 121.5(8) . . ?
C7 C8 C16 119.8(8) . . ?
C10 C9 C8 120.9(8) . . ?
C10 C9 H9 119.5 . . ?
C8 C9 H9 119.5 . . ?
C9 C10 N1 119.5(7) . . ?
C9 C10 C11 128.5(7) . . ?
N1 C10 C11 111.9(7) . . ?
C12 C11 N3 120.0(7) . . ?
C12 C11 C10 124.5(8) . . ?
N3 C11 C10 115.4(6) . . ?
C11 C12 C13 119.4(9) . . ?
C11 C12 H12 120.3 . . ?
C13 C12 H12 120.3 . . ?
C14 C13 C12 118.8(8) . . ?
C14 C13 H13 120.6 . . ?
C12 C13 H13 120.6 . . ?
C13 C14 C15 120.6(8) . . ?
C13 C14 H14 119.7 . . ?
C15 C14 H14 119.7 . . ?
N3 C15 C14 121.7(8) . . ?
N3 C15 H15 119.1 . . ?
C14 C15 H15 119.1 . . ?
C21' C16 C17 95.3(15) . . ?
C21' C16 C21 44.7(13) . . ?
C17 C16 C21 119.5(16) . . ?
C21' C16 C17' 117.7(11) . . ?
C17 C16 C17' 59.6(13) . . ?
C21 C16 C17' 96.3(15) . . ?
C21' C16 C8 122.5(10) . . ?
C17 C16 C8 120.2(11) . . ?
C21 C16 C8 119.8(13) . . ?
C17' C16 C8 119.2(10) . . ?
C16 C17 C18 120(2) . . ?
C16 C17 C17' 62.7(13) . . ?
C18 C17 C17' 89(2) . . ?
C16 C17 C18' 91.4(15) . . ?
C18 C17 C18' 45.3(16) . . ?
C17' C17 C18' 44.1(12) . . ?
C16 C17 C21' 41.7(10) . . ?
C18 C17 C21' 89.6(18) . . ?
C17' C17 C21' 86.8(14) . . ?
C18' C17 C21' 87.2(11) . . ?
C16 C17 H17 118(2) . . ?
C18 C17 H17 120(3) . . ?
C17' C17 H17 105(2) . . ?
C18' C17 H17 122(2) . . ?
C21' C17 H17 148(2) . . ?
C18' C17' C17 89.1(19) . . ?
C18' C17' C16 118.4(15) . . ?
C17 C17' C16 57.8(13) . . ?
C18' C17' C18 43.9(14) . . ?
C17 C17' C18 45.1(14) . . ?
C16 C17' C18 88.3(15) . . ?
C18' C17' H17' 120.4(17) . . ?
C17 C17' H17' 118(2) . . ?
C16 C17' H17' 121.1(15) . . ?
C18 C17' H17' 133.3(18) . . ?
C18' C18 C19 64.2(17) . . ?
C18' C18 C17 88(2) . . ?
C19 C18 C17 118(2) . . ?
C18' C18 C17' 42.8(13) . . ?
C19 C18 C17' 90.4(17) . . ?
C17 C18 C17' 45.5(14) . . ?
C18' C18 H18 114(3) . . ?
C19 C18 H18 121(2) . . ?
C17 C18 H18 122(3) . . ?
C17' C18 H18 130(3) . . ?
C17' C18' C18 93(2) . . ?
C17' C18' C19 118.9(15) . . ?
C18 C18' C19 58.4(17) . . ?
C17' C18' C17 46.8(13) . . ?
C18 C18' C17 46.5(14) . . ?
C19 C18' C17 88.0(14) . . ?
C17' C18' H18' 124(2) . . ?
C18 C18' H18' 109(3) . . ?
C19 C18' H18' 117(2) . . ?
C17 C18' H18' 129.8(19) . . ?
C20' C19 C18 100(2) . . ?
C20' C19 C20 45.6(16) . . ?
C18 C19 C20 127(2) . . ?
C20' C19 C18' 119.0(13) . . ?
C18 C19 C18' 57.4(16) . . ?
C20 C19 C18' 100(2) . . ?
C20' C19 Br1 122.0(11) . . ?
C18 C19 Br1 116.8(13) . . ?
C20 C19 Br1 116.4(17) . . ?
C18' C19 Br1 118.6(11) . . ?
C20' C20 C19 59(3) . . ?
C20' C20 C21 85(3) . . ?
C19 C20 C21 111(3) . . ?
C20' C20 C21' 49(2) . . ?
C19 C20 C21' 90(2) . . ?
C21 C20 C21' 35.8(16) . . ?
C20' C20 H20 73(3) . . ?
C19 C20 H20 104(4) . . ?
C21 C20 H20 120(4) . . ?
C21' C20 H20 99(3) . . ?
C20' C20 H20' 41(2) . . ?
C19 C20 H20' 82(3) . . ?
C21 C20 H20' 107(3) . . ?
C21' C20 H20' 75(2) . . ?
H20 C20 H20' 32.5(16) . . ?
C20 C20' C19 75(3) . . ?
C20 C20' C21' 95(3) . . ?
C19 C20' C21' 122.9(17) . . ?
C20 C20' C21 57(3) . . ?
C19 C20' C21 104.9(19) . . ?
C21' C20' C21 37.9(12) . . ?
C20 C20' H20 50(3) . . ?
C19 C20' H20 100.6(17) . . ?
C21' C20' H20 116(2) . . ?
C21 C20' H20 90.3(19) . . ?
C20 C20' H20' 91(3) . . ?
C19 C20' H20' 116.5(17) . . ?
C21' C20' H20' 119.9(19) . . ?
C21 C20' H20' 119(2) . . ?
H20 C20' H20' 41.3(10) . . ?
C21' C21 C16 65(2) . . ?
C21' C21 C20 90(3) . . ?
C16 C21 C20 124(3) . . ?
C21' C21 C20' 52.5(19) . . ?
C16 C21 C20' 98(2) . . ?
C20 C21 C20' 38.1(18) . . ?
C21' C21 H21 97(3) . . ?
C16 C21 H21 116(3) . . ?
C20 C21 H21 116(3) . . ?
C20' C21 H21 119(3) . . ?
C21' C21 H21' 35.1(15) . . ?
C16 C21 H21' 83.0(19) . . ?
C20 C21 H21' 105(3) . . ?
C20' C21 H21' 74.5(17) . . ?
H21 C21 H21' 62(2) . . ?
C21 C21' C16 70.4(19) . . ?
C21 C21' C20' 90(2) . . ?
C16 C21' C20' 121.6(15) . . ?
C21 C21' C20 54(2) . . ?
C16 C21' C20 105.5(18) . . ?
C20' C21' C20 36.0(17) . . ?
C21 C21' C17 98(2) . . ?
C16 C21' C17 43.0(10) . . ?
C20' C21' C17 90.9(14) . . ?
C20 C21' C17 98.8(16) . . ?
C21 C21' H21 36.4(17) . . ?
C16 C21' H21 88.2(12) . . ?
C20' C21' H21 107.2(19) . . ?
C20 C21' H21 74.9(18) . . ?
C17 C21' H21 128.2(14) . . ?
C21 C21' H21' 104(3) . . ?
C16 C21' H21' 118.4(17) . . ?
C20' C21' H21' 120(2) . . ?
C20 C21' H21' 119(2) . . ?
C17 C21' H21' 142(2) . . ?
H21 C21' H21' 67.5(12) . . ?
C23 C22 C27 119.9(8) . . ?
C23 C22 Ir1 128.3(7) . . ?
C27 C22 Ir1 111.8(6) . . ?
C24 C23 C22 121.3(11) . . ?
C24 C23 H23 119.3 . . ?
C22 C23 H23 119.3 . . ?
C23 C24 C25 120.1(10) . . ?
C23 C24 H24 119.9 . . ?
C25 C24 H24 119.9 . . ?
C26 C25 C24 119.2(10) . . ?
C26 C25 H25 120.4 . . ?
C24 C25 H25 120.4 . . ?
C25 C26 C27 119.3(11) . . ?
C25 C26 H26 120.3 . . ?
C27 C26 H26 120.3 . . ?
C22 C27 C26 120.1(9) . . ?
C22 C27 C28 117.4(7) . . ?
C26 C27 C28 122.4(9) . . ?
N4 C28 C29 118.6(8) . . ?
N4 C28 C27 112.6(7) . . ?
C29 C28 C27 128.8(8) . . ?
C28 C29 C30 121.7(8) . . ?
C28 C29 H29 119.2 . . ?
C30 C29 H29 119.2 . . ?
C29 C30 C31 117.7(8) . . ?
C29 C30 C39 121.5(8) . . ?
C31 C30 C39 120.6(9) . . ?
C32 C31 C30 119.8(9) . . ?
C32 C31 H31 120.1 . . ?
C30 C31 H31 120.1 . . ?
N4 C32 C31 120.3(7) . . ?
N4 C32 C33 112.5(7) . . ?
C31 C32 C33 127.2(8) . . ?
C34 C33 C38 122.0(7) . . ?
C34 C33 C32 122.2(7) . . ?
C38 C33 C32 115.8(7) . . ?
C35 C34 C33 119.1(9) . . ?
C35 C34 H34 120.4 . . ?
C33 C34 H34 120.4 . . ?
C34 C35 C36 120.4(9) . . ?
C34 C35 H35 119.8 . . ?
C36 C35 H35 119.8 . . ?
C35 C36 C37 119.3(9) . . ?
C35 C36 H36 120.3 . . ?
C37 C36 H36 120.3 . . ?
C38 C37 C36 122.7(9) . . ?
C38 C37 H37 118.7 . . ?
C36 C37 H37 118.7 . . ?
C37 C38 C33 116.5(8) . . ?
C37 C38 Ir1 130.6(7) . . ?
C33 C38 Ir1 112.5(6) . . ?
C40 C39 C44 116.7(9) . . ?
C40 C39 C30 122.5(8) . . ?
C44 C39 C30 120.9(9) . . ?
C39 C40 C41 121.0(9) . . ?
C39 C40 H40 119.5 . . ?
C41 C40 H40 119.5 . . ?
C42 C41 C40 121.1(9) . . ?
C42 C41 H41 119.5 . . ?
C40 C41 H41 119.5 . . ?
C43 C42 C41 117.9(9) . . ?
C43 C42 C45 120.5(10) . . ?
C41 C42 C45 121.6(10) . . ?
C42 C43 C44 121.1(10) . . ?
C42 C43 H43 119.4 . . ?
C44 C43 H43 119.4 . . ?
C39 C44 C43 122.2(10) . . ?
C39 C44 H44 118.9 . . ?
C43 C44 H44 118.9 . . ?
C42 C45 H451 109.5 . . ?
C42 C45 H452 109.5 . . ?
H451 C45 H452 109.5 . . ?
C42 C45 H453 109.5 . . ?
H451 C45 H453 109.5 . . ?
H452 C45 H453 109.5 . . ?
O3A N5 O2A 90(3) . . ?
O3A N5 O2B 117(3) . . ?
O2A N5 O2B 66(3) . . ?
O3A N5 O1 129(3) . . ?
O2A N5 O1 134(2) . . ?
O2B N5 O1 106.2(19) . . ?
O3A N5 O3B 34.8(18) . . ?
O2A N5 O3B 110(3) . . ?
O2B N5 O3B 151(2) . . ?
O1 N5 O3B 96(2) . . ?
N5 O2A O2B 60(2) . . ?
N5 O2A O3A 42.3(18) . . ?
O2B O2A O3A 86(3) . . ?
N5 O2B O2A 54(2) . . ?
O3B O3A N5 96(4) . . ?
O3B O3A O2A 121(4) . . ?
N5 O3A O2A 48(2) . . ?
O3A O3B N5 49(3) . . ?
 
_diffrn_measured_fraction_theta_max    0.995
_diffrn_reflns_theta_full              26.00
_diffrn_measured_fraction_theta_full   0.995
_refine_diff_density_max    1.730
_refine_diff_density_min   -1.058
_refine_diff_density_rms    0.142
